# Supplementary material for: Serum KL-6 as a Candidate Predictor of Outcome in Patients with SARS-CoV-2 Pneumonia
Source: MDPI journal article supplement (doi:10.3390/jcm12216772), 2023-10-26
Supplement: s1 [file s1]

## Supplemental Material

**Table S1:** Inclusion and Exclusion criteria of the present study.

| <u>Inclusion criteria</u>                                                                                                                                                                  | <u>Exclusion criteria</u>                                                                                                                                                                                                                                    |
|--------------------------------------------------------------------------------------------------------------------------------------------------------------------------------------------|--------------------------------------------------------------------------------------------------------------------------------------------------------------------------------------------------------------------------------------------------------------|
| <ul style="list-style-type: none"> <li>• Patient with SARS-CoV-2 pneumonia* independent of preexisting lung diseases or other comorbidities</li> <li>• Written informed consent</li> </ul> | <ul style="list-style-type: none"> <li>• Age &lt; 18 years</li> <li>• Pneumonia due to other causes than SARS-CoV-2</li> <li>• Inability to provide informed consent due to the clinical condition</li> <li>• Contraindications to blood sampling</li> </ul> |
| * according to C. Huang et al. 2020 [2]                                                                                                                                                    |                                                                                                                                                                                                                                                              |

**Table S2:** WHO Clinical Progression Scale of COVID-19 modified presentation of J. C. Marshall et al. 2020 [22].

| <u>Score</u> | <u>Details</u>                                                   | <u>Patient scale</u> |
|--------------|------------------------------------------------------------------|----------------------|
| 0-3          | Ambulatory                                                       | Mild disease         |
| 4            | No oxygen                                                        | Moderate Disease:    |
| 5            | Oxygen by mask or nasal prongs                                   | Hospitalized         |
| 6            | Non invasive ventilation or high flow                            | Severe Disease:      |
| 7            | Intubation and mechanical ventilation $paO_2/FiO_2 \geq 150$     | Hospitalized, ICU    |
| 8            | Mechanical ventilation $paO_2/FiO_2 \leq 150$ or vasopressin     |                      |
| 9            | Mechanical ventilation $paO_2/FiO_2 \leq 150$ , dialysis or ECMO |                      |
| 10           | Death                                                            | Dead                 |

**Table S3:** Serum KL-6 values at baseline according to WHO Clinical Progression Scale [22].

| WHO Score  | 4                  | 5                  | 6                  | 7-9                 | 10                 |
|------------|--------------------|--------------------|--------------------|---------------------|--------------------|
| N          | 21                 | 68                 | 48                 | 5                   | 15                 |
| KL-6, U/ml | 364<br>[230 - 517] | 358<br>[246 - 389] | 515<br>[329 - 753] | 535<br>[387 - 1021] | 608<br>[348 - 935] |
